# Supplementary material
Source: PubMed Central journal article supplement (PMC3063899)

**Supplementary Figure 1.** Purification of TcdA and TcdB from filtered supernatants of *C.difficile* NAP-1/027 cultures. **(a)** Coomassie-stained SDS-PAGE gel with TcdA/TcdB (100kDa filtered input), TcdA- and TcdB-containing fractions. **(b)** Western blotting of the TcdA/TcdB, TcdA- and TcdB-containing fractions with mouse monoclonal anti-TcdA and TcdB antibodies.

**Supplementary Figure 2.** Inhibition of NO synthases with L-NAME (100 $\mu$ M) has no effect on toxin-induced (100 $\mu$ g/mL) upregulation of HIF-1 $\alpha$  gene expression **(a)** as assessed with qPCR; \* denotes  $p < 0.05$  compared to control,  $n = 4$ . **(b)** L-NAME did not alter toxin-induced changes in TER. Caco-2 cells were exposed to vehicle (control), *C.difficile* toxin (60 $\mu$ g/mL), L-NAME (100 $\mu$ M) with *C.difficile* toxin (60 $\mu$ g/mL) or L-NAME (100 $\mu$ M) alone. Time (min) indicates the time elapsed following addition of toxin to monolayer, data are expressed as a percentage of the control TER, # $p < 0.005$  compared to control,  $n = 4$ .

**Supplementary Figure 3.** Treatment of Caco-2 cells with dimethyloxallyl glycine (DMOG, 500  $\mu$ M for 2h) upregulates HIF-1 $\alpha$  protein.

Suppl. Figure 1.

**a**

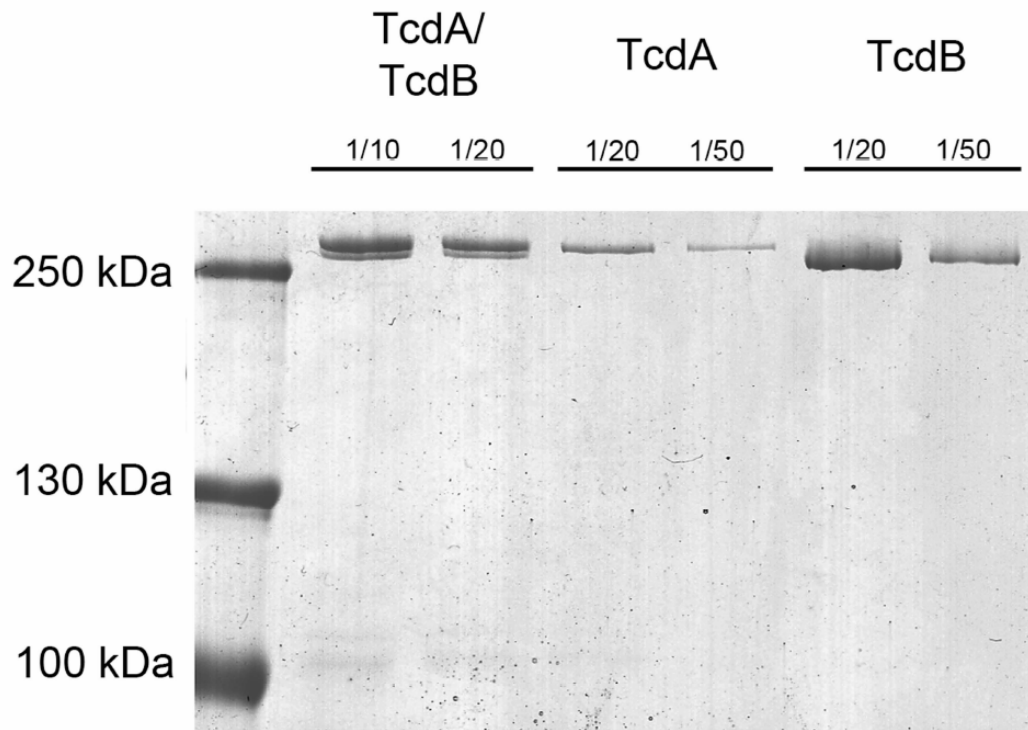

**b**

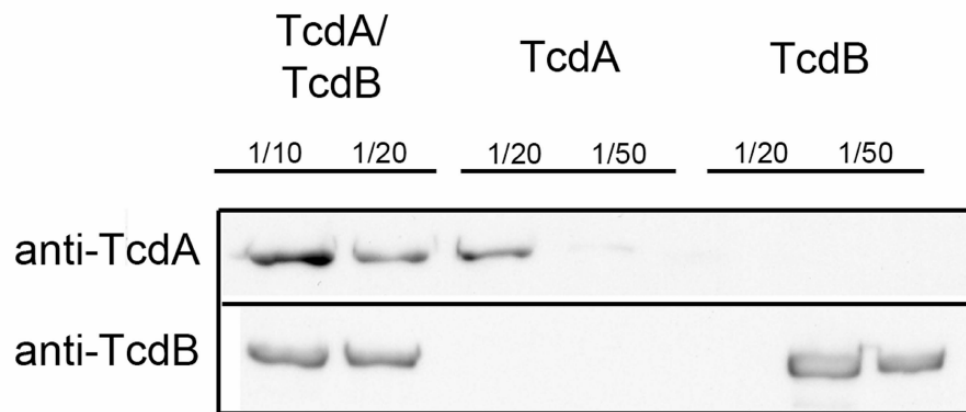

Suppl. Figure 2.

**a**

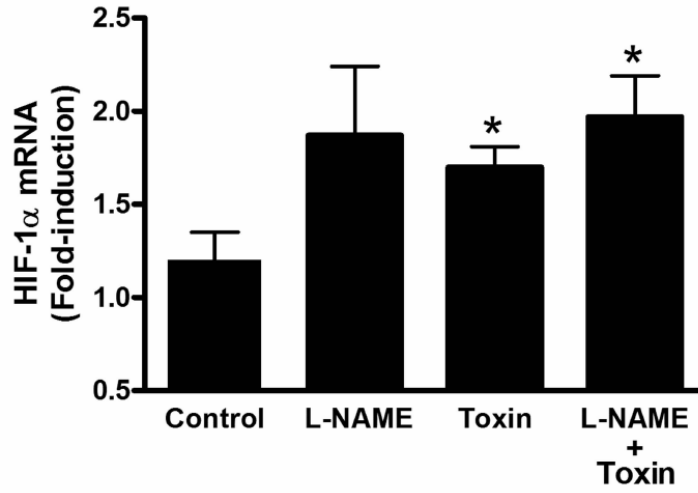

**b**

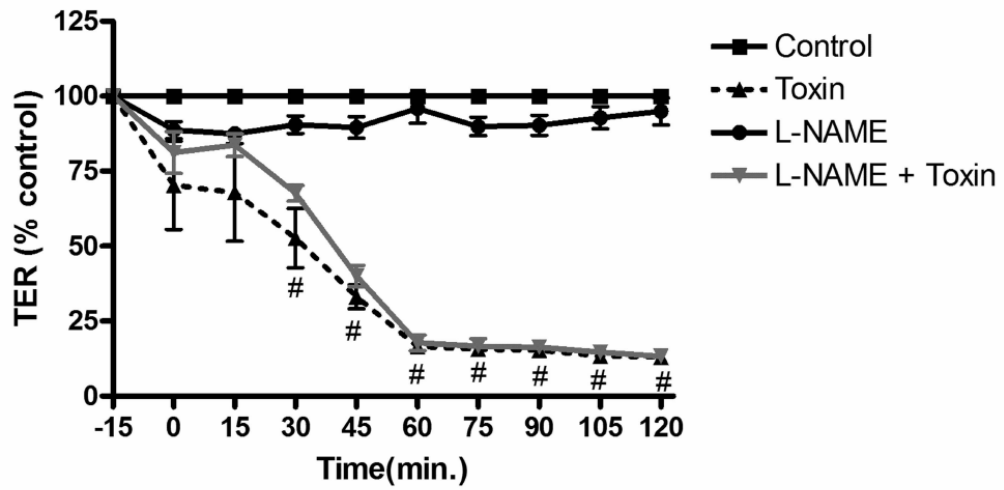

Suppl. Figure 3.

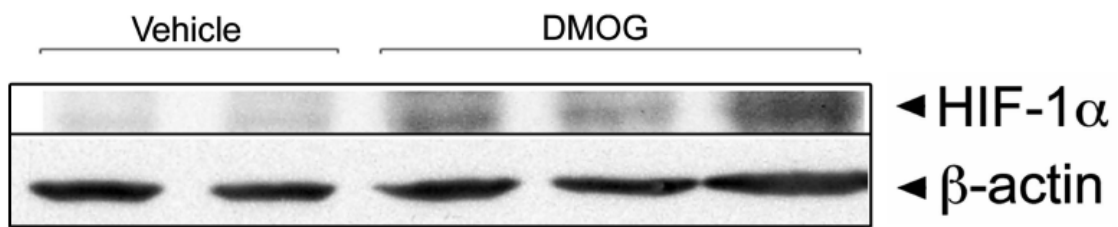

Supplement: NIHMS266500-supplement-01.pdf [file NIHMS266500-supplement-01.pdf]
